# Supplementary material
Source: PubMed Central journal article supplement (PMC10615132)
Supplement: ntr_19_8_937_s2.pdf [file ntr_19_8_937_s2.pdf]

# MUSC OPT-OUT Smoking Cessation Program - QUIT Manager Workflow (5 'A's)

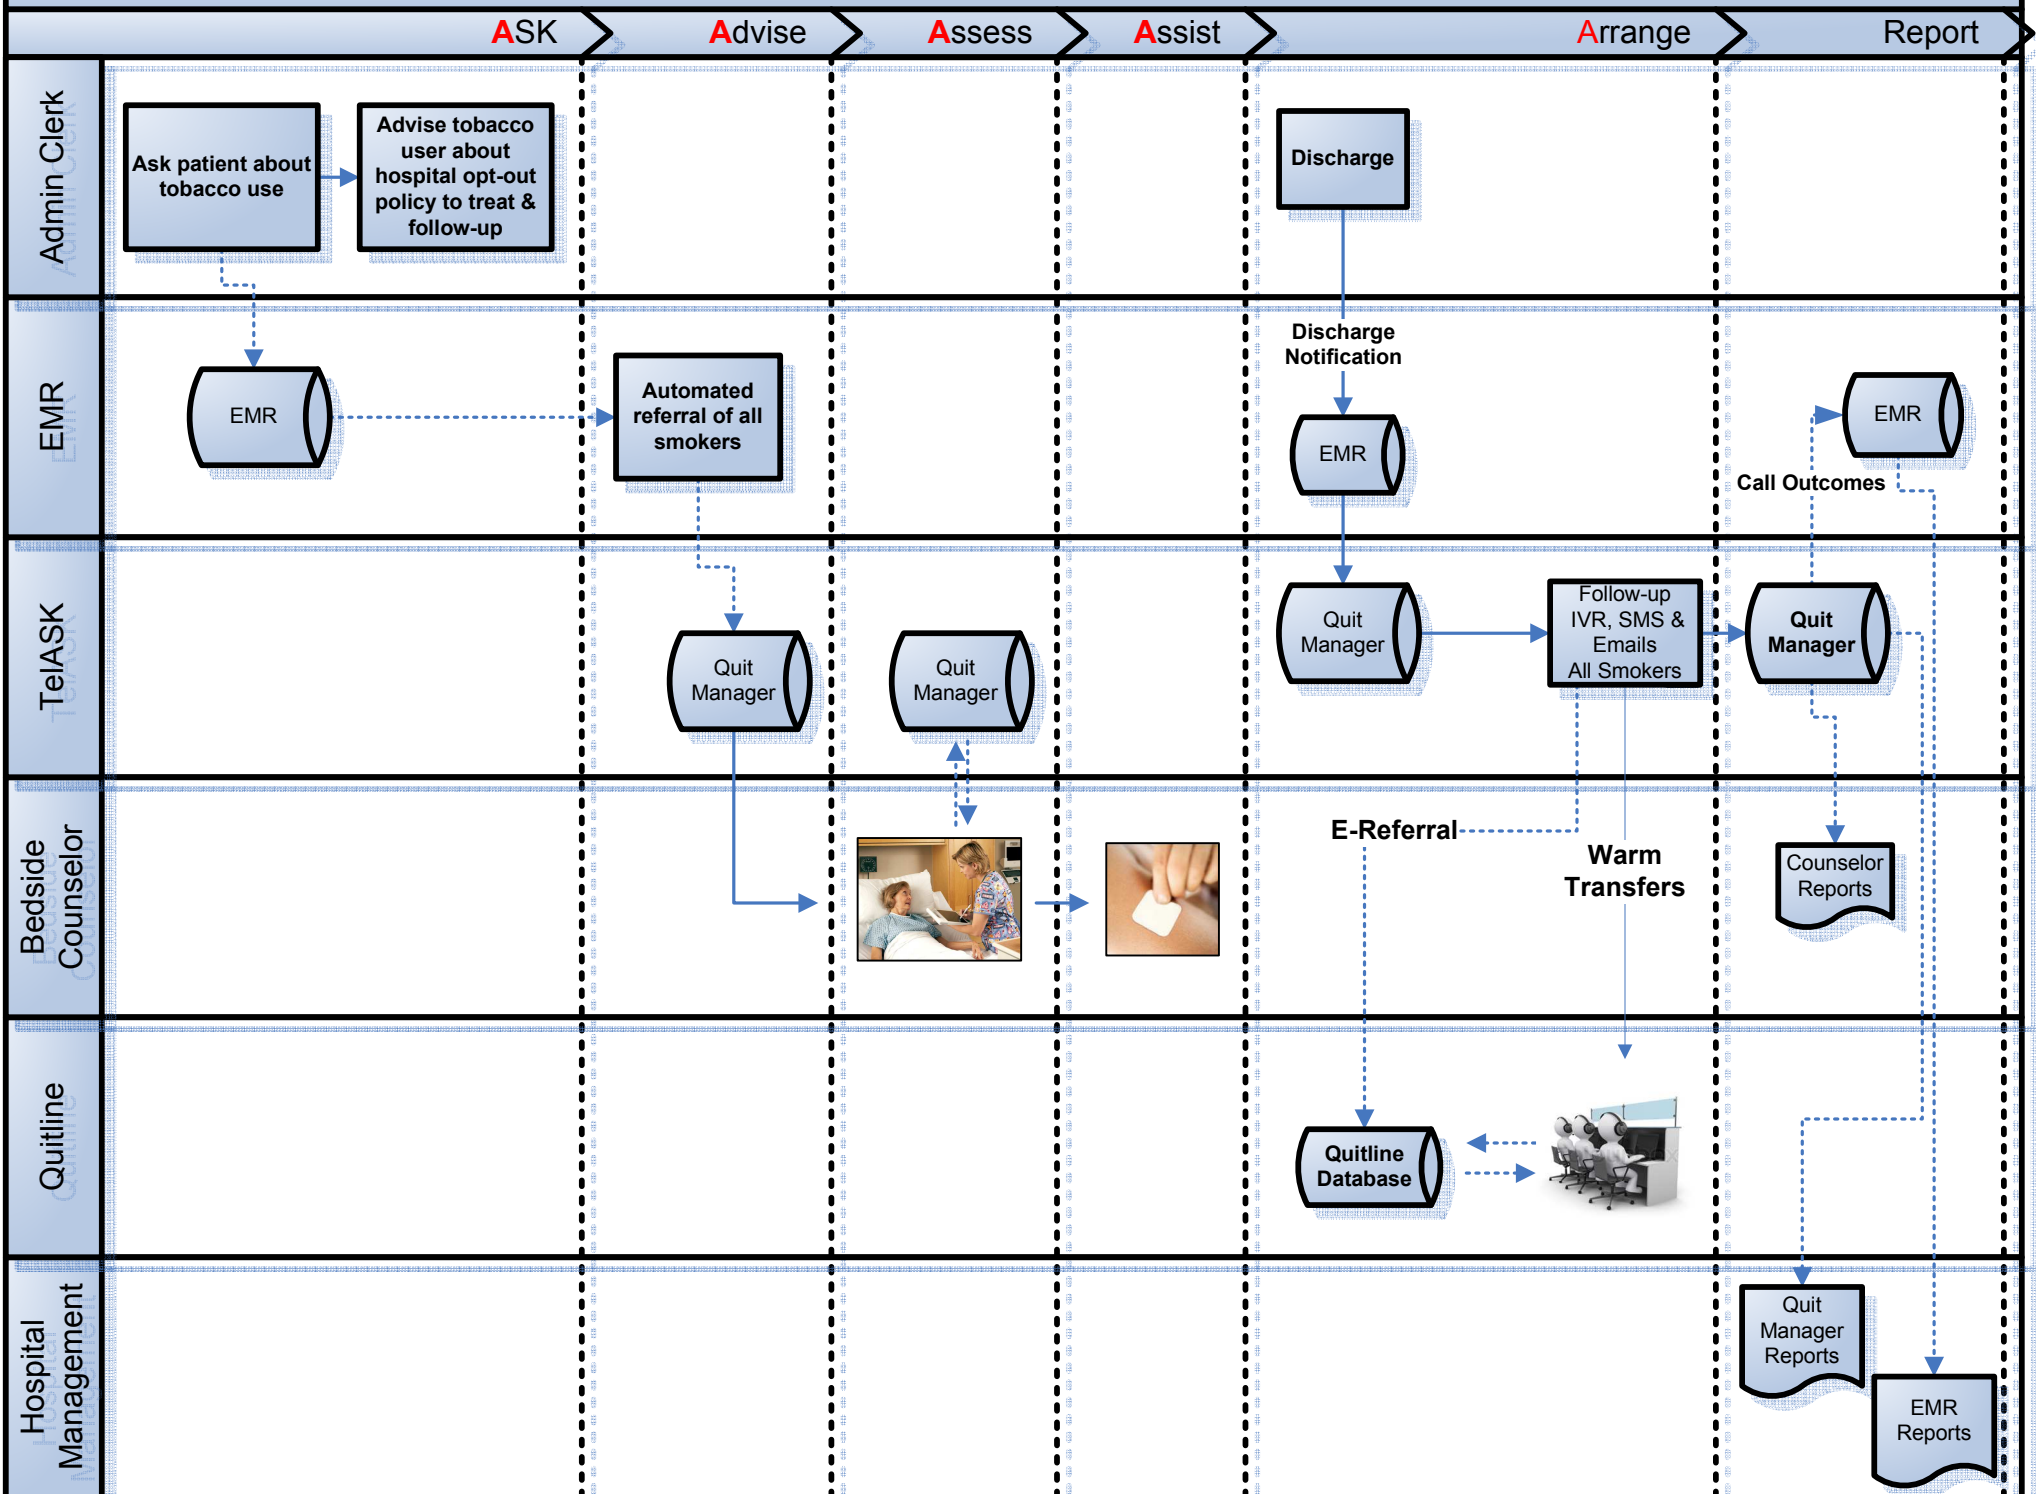

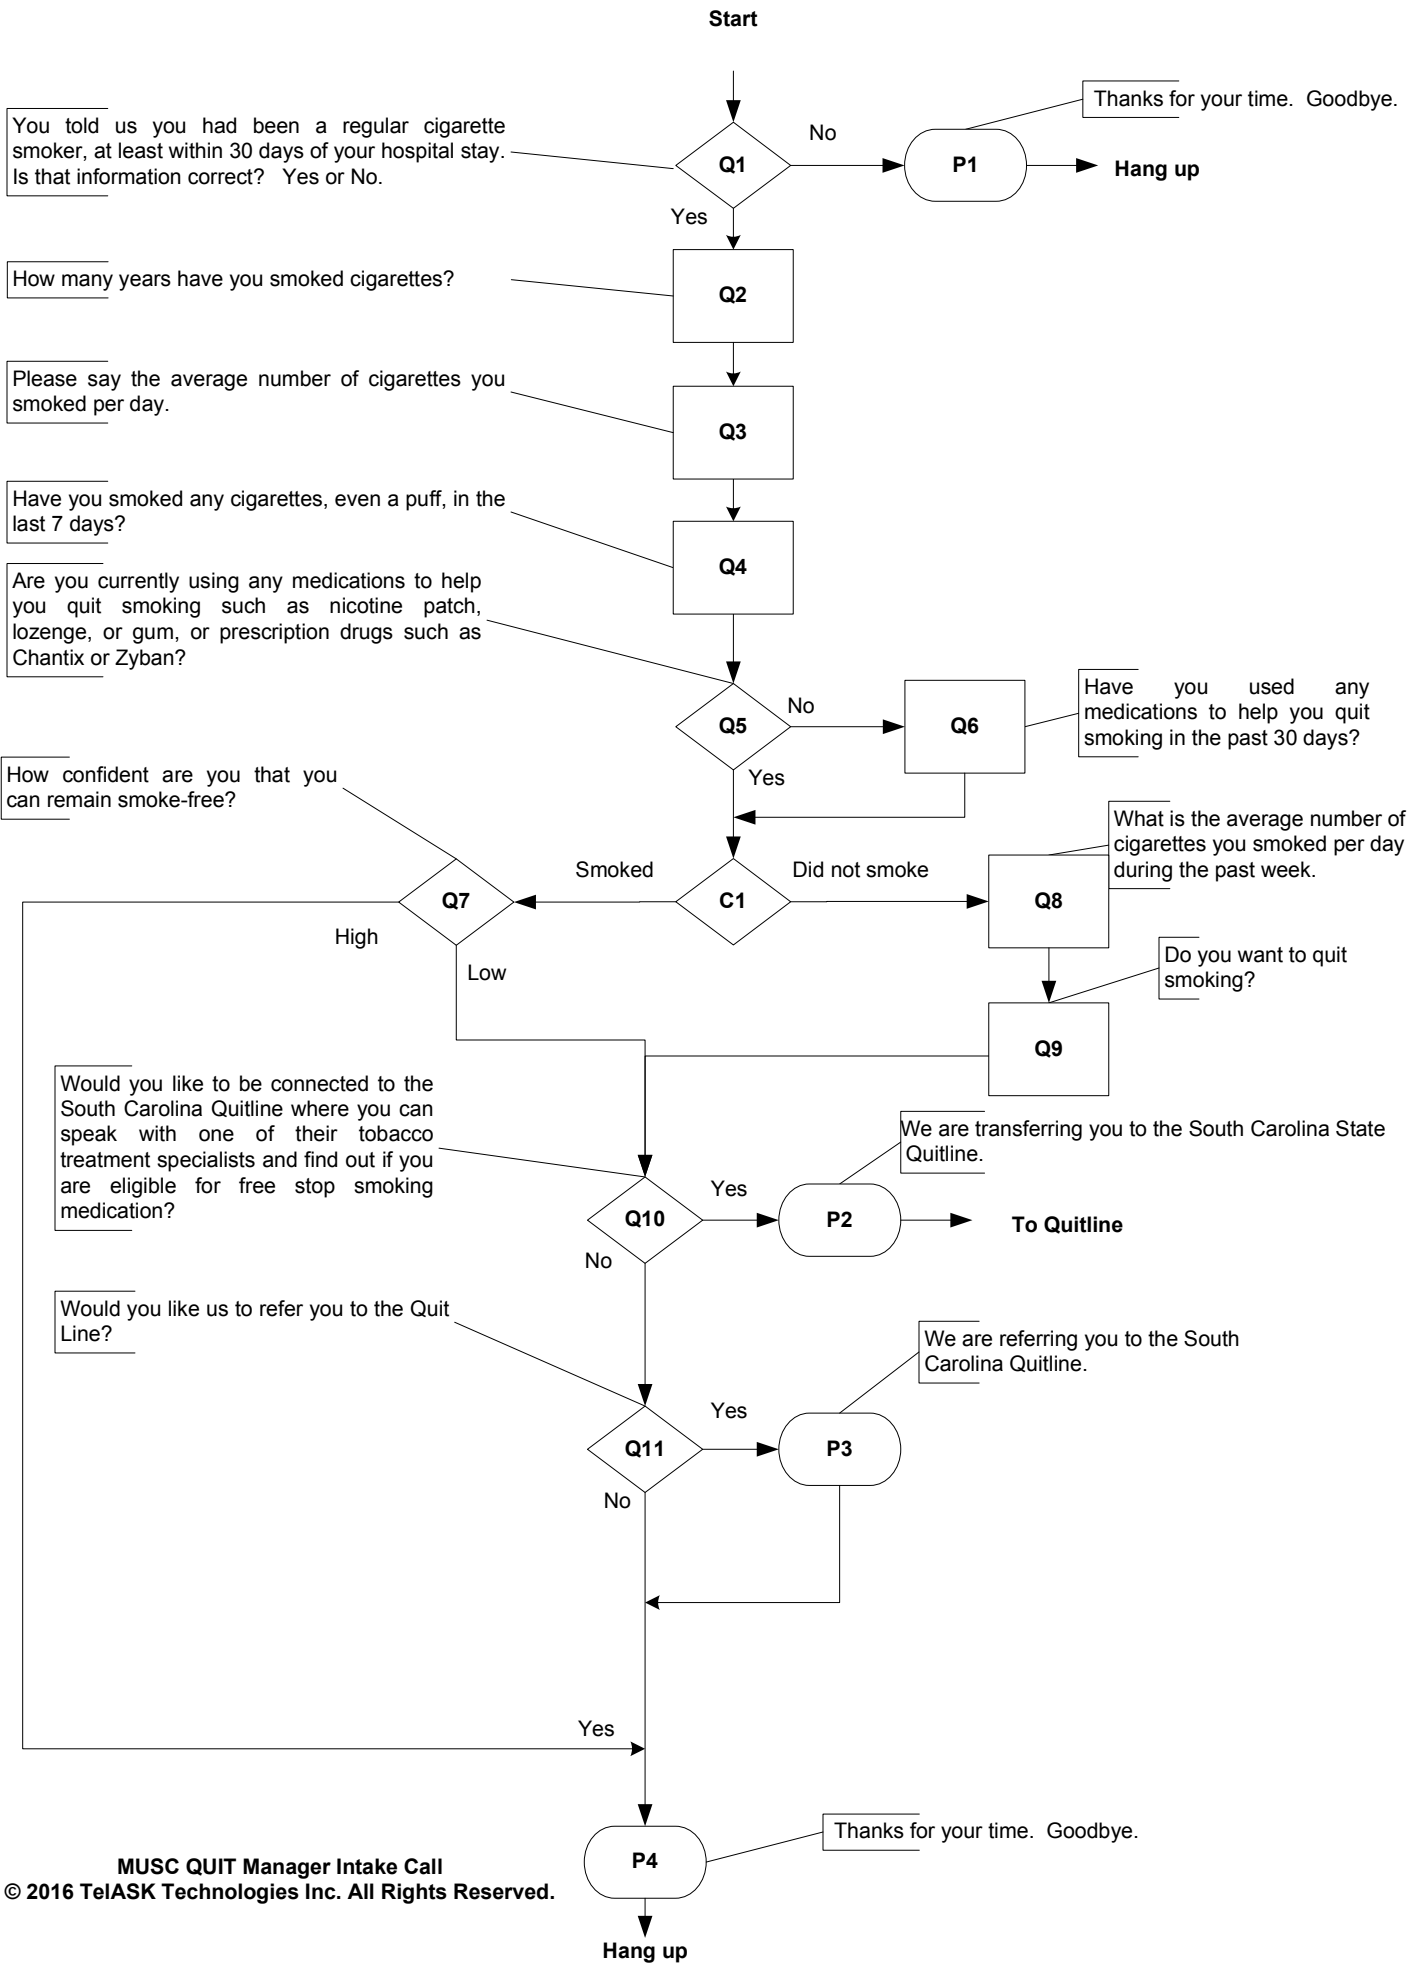

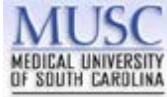

# Medical University of South Carolina

|                                                                                                                                                                                                                                                                                                                    |  |                                                                             |                                                                                                                                                                                                                    |
|--------------------------------------------------------------------------------------------------------------------------------------------------------------------------------------------------------------------------------------------------------------------------------------------------------------------|--|-----------------------------------------------------------------------------|--------------------------------------------------------------------------------------------------------------------------------------------------------------------------------------------------------------------|
| <b>First Name</b> _____<br><b>Last Name</b> _____                                                                                                                                                                                                                                                                  |  | <b>Visit Date</b> _____<br>(mm/dd/yyyy)                                     | <b>Date of Birth</b> _____<br>(mm/dd/yyyy)                                                                                                                                                                         |
| <b>Race/ethnicity</b><br><input type="checkbox"/> White/Caucasian <input type="checkbox"/> American Indian/Alaska Native<br><input type="checkbox"/> Asian <input type="checkbox"/> Unknown<br><input type="checkbox"/> Black/African American <input type="checkbox"/> Hispanic<br><input type="checkbox"/> Other |  | <b>Sex</b> <input type="checkbox"/> Male<br><input type="checkbox"/> Female | <b>Insurance</b><br><input type="checkbox"/> Medicare<br><input type="checkbox"/> Medicaid<br><input type="checkbox"/> Commercial/private<br><input type="checkbox"/> Self-pay<br><input type="checkbox"/> Unknown |

|                                                                                                                 |                                                             |                                                                                                                                                                          |                                                                                                                                          |                                                                                                 |                                                                          |
|-----------------------------------------------------------------------------------------------------------------|-------------------------------------------------------------|--------------------------------------------------------------------------------------------------------------------------------------------------------------------------|------------------------------------------------------------------------------------------------------------------------------------------|-------------------------------------------------------------------------------------------------|--------------------------------------------------------------------------|
| <b>Have you ever used cigarettes?</b><br><input type="checkbox"/> Yes<br><input type="checkbox"/> No (next row) | <b>How many years did you use cigarettes?</b><br>____ years | <b>Have you used cigarettes in the past 30 days?</b><br><input type="checkbox"/> Yes<br><input type="checkbox"/> No – <b>how long ago did you stop using?</b> ____ years | <b>Before coming to the clinic did you use cigarettes...</b><br><input type="checkbox"/> every day<br><input type="checkbox"/> non-daily | <b>On the days that you used cigarettes, how much did you typically use?</b><br>____ cigarettes | <b>How soon after you wake up do you use cigarettes?</b><br>____ minutes |
|-----------------------------------------------------------------------------------------------------------------|-------------------------------------------------------------|--------------------------------------------------------------------------------------------------------------------------------------------------------------------------|------------------------------------------------------------------------------------------------------------------------------------------|-------------------------------------------------------------------------------------------------|--------------------------------------------------------------------------|

|                                                                                                             |                                                         |                                                                                                                                                                      |                                                                                                                                       |                                                                                             |                                                                      |
|-------------------------------------------------------------------------------------------------------------|---------------------------------------------------------|----------------------------------------------------------------------------------------------------------------------------------------------------------------------|---------------------------------------------------------------------------------------------------------------------------------------|---------------------------------------------------------------------------------------------|----------------------------------------------------------------------|
| <b>Have you ever used cigars?</b><br><input type="checkbox"/> Yes<br><input type="checkbox"/> No (next row) | <b>How many years did you use cigars?</b><br>____ years | <b>Have you used cigars in the past 30 days?</b><br><input type="checkbox"/> Yes<br><input type="checkbox"/> No – <b>how long ago did you stop using?</b> ____ years | <b>Before coming to the clinic did you use cigars ...</b><br><input type="checkbox"/> every day<br><input type="checkbox"/> non-daily | <b>On the days that you used cigars, how much did you typically use?</b><br>____ cigarettes | <b>How soon after you wake up do you use cigars?</b><br>____ minutes |
|-------------------------------------------------------------------------------------------------------------|---------------------------------------------------------|----------------------------------------------------------------------------------------------------------------------------------------------------------------------|---------------------------------------------------------------------------------------------------------------------------------------|---------------------------------------------------------------------------------------------|----------------------------------------------------------------------|

|                                                                                                             |                                                         |                                                                                                                                                                      |                                                                                                                                       |                                                                                               |                                                                      |
|-------------------------------------------------------------------------------------------------------------|---------------------------------------------------------|----------------------------------------------------------------------------------------------------------------------------------------------------------------------|---------------------------------------------------------------------------------------------------------------------------------------|-----------------------------------------------------------------------------------------------|----------------------------------------------------------------------|
| <b>Have you ever used hookah?</b><br><input type="checkbox"/> Yes<br><input type="checkbox"/> No (next row) | <b>How many years did you use hookah?</b><br>____ years | <b>Have you used hookah in the past 30 days?</b><br><input type="checkbox"/> Yes<br><input type="checkbox"/> No – <b>how long ago did you stop using?</b> ____ years | <b>Before coming to the clinic did you use hookah ...</b><br><input type="checkbox"/> every day<br><input type="checkbox"/> non-daily | <b>On the days that you use hookah, how many "heads" or "bowls" do you use per day?</b> _____ | <b>How soon after you wake up do you use hookah?</b><br>____ minutes |
|-------------------------------------------------------------------------------------------------------------|---------------------------------------------------------|----------------------------------------------------------------------------------------------------------------------------------------------------------------------|---------------------------------------------------------------------------------------------------------------------------------------|-----------------------------------------------------------------------------------------------|----------------------------------------------------------------------|

|                                                                                                                   |                                                               |                                                                                                                                                                            |                                                                                                                                             |                                                                                                      |                                                                            |
|-------------------------------------------------------------------------------------------------------------------|---------------------------------------------------------------|----------------------------------------------------------------------------------------------------------------------------------------------------------------------------|---------------------------------------------------------------------------------------------------------------------------------------------|------------------------------------------------------------------------------------------------------|----------------------------------------------------------------------------|
| <b>Have you ever used oral tobacco?</b><br><input type="checkbox"/> Yes<br><input type="checkbox"/> No (next row) | <b>How many years did you use oral tobacco?</b><br>____ years | <b>Have you used oral tobacco in the past 30 days?</b><br><input type="checkbox"/> Yes<br><input type="checkbox"/> No – <b>how long ago did you stop using?</b> ____ years | <b>Before coming to the clinic did you use oral tobacco ...</b><br><input type="checkbox"/> every day<br><input type="checkbox"/> non-daily | <b>How many cans of snuff or pouches of chewing tobacco do you use weekly?</b><br>_____ cans/pouches | <b>How soon after you wake up do you use oral tobacco?</b><br>____ minutes |
|-------------------------------------------------------------------------------------------------------------------|---------------------------------------------------------------|----------------------------------------------------------------------------------------------------------------------------------------------------------------------------|---------------------------------------------------------------------------------------------------------------------------------------------|------------------------------------------------------------------------------------------------------|----------------------------------------------------------------------------|

|                                                                                                                   |                                                               |                                                                                                                                                                            |                                                                                                                                            |                                                                                             |                                                                            |
|-------------------------------------------------------------------------------------------------------------------|---------------------------------------------------------------|----------------------------------------------------------------------------------------------------------------------------------------------------------------------------|--------------------------------------------------------------------------------------------------------------------------------------------|---------------------------------------------------------------------------------------------|----------------------------------------------------------------------------|
| <b>Have you ever used e-cigarettes?</b><br><input type="checkbox"/> Yes<br><input type="checkbox"/> No (next row) | <b>How many years did you use e-cigarettes?</b><br>____ years | <b>Have you used e-cigarettes in the past 30 days?</b><br><input type="checkbox"/> Yes<br><input type="checkbox"/> No – <b>how long ago did you stop using?</b> ____ years | <b>Before coming to the clinic did you use e-cigarettes...</b><br><input type="checkbox"/> every day<br><input type="checkbox"/> non-daily | <b>On the days that you vape, how many times do you use an e-cigarette per day</b><br>_____ | <b>How soon after you wake up do you use e-cigarettes?</b><br>____ minutes |
|-------------------------------------------------------------------------------------------------------------------|---------------------------------------------------------------|----------------------------------------------------------------------------------------------------------------------------------------------------------------------------|--------------------------------------------------------------------------------------------------------------------------------------------|---------------------------------------------------------------------------------------------|----------------------------------------------------------------------------|

Do others use tobacco at home?  Yes  No

How many quit attempts (of at least 24 hours) have you made in the past? \_\_\_\_\_ (attempts)

What is the longest time you have quit for? \_\_\_\_\_ (days)

What method or smoking cessation aids did you use to quit during your most recent quit attempt? Check all that apply

Just tried to quit on my own, with no help  Got a prescription for medication from my doctor  
 Attended a stop smoking class  Bought nicotine medication over the counter  
 Called the a Quit-line  Bought an e-cigarette  
 Patch  Gum  Lozenge  Inhaler  Nasal spray  Zyban / Wellbutrin  Chantix / Varenicline

How **motivated** are you to stop smoking / remain smoke-free?  
 Very motivated  Not very motivated  Somewhat motivated  Unsure/don't know

How **confident** are you that you can stop smoking / remain smoke-free?  
 Very confident  Not very confident  Somewhat confident  Unsure/don't know

Which statement best describes you now?  
 Already Quit – more than 30 days  Not Quit, but plan to stop within the next 30 days  
 Already Quit – within the past 30 days  Not Ready to Quit, but will try to reduce the amount smoked  
 Not Quit, but ready to do so today  Not Ready to Quit, and no interest in changing smoking behavior at this time

|                                                                                                                                                                                                                                                                                                           |                                                                                                                                                                                                  |
|-----------------------------------------------------------------------------------------------------------------------------------------------------------------------------------------------------------------------------------------------------------------------------------------------------------|--------------------------------------------------------------------------------------------------------------------------------------------------------------------------------------------------|
| <p><b>On any day in the past year, have you ever had:</b><br/>         For <b>MEN</b>: more than 4 "standard drinks"? <input type="checkbox"/> Yes <input type="checkbox"/> No<br/>         For <b>WOMEN</b>: more than 3 "standard drinks"? <input type="checkbox"/> Yes <input type="checkbox"/> No</p> | <p><b>Think about your typical week:</b><br/>         On average how many days per week do you drink alcohol? ____<br/>         On a typical drinking day, how many drinks do you have? ____</p> |
|-----------------------------------------------------------------------------------------------------------------------------------------------------------------------------------------------------------------------------------------------------------------------------------------------------------|--------------------------------------------------------------------------------------------------------------------------------------------------------------------------------------------------|

|                                                                                                                                                                                                                                                                                                                                                                                                                                                                            |                                                                                                                                                                                                                                                                                                                                                               |
|----------------------------------------------------------------------------------------------------------------------------------------------------------------------------------------------------------------------------------------------------------------------------------------------------------------------------------------------------------------------------------------------------------------------------------------------------------------------------|---------------------------------------------------------------------------------------------------------------------------------------------------------------------------------------------------------------------------------------------------------------------------------------------------------------------------------------------------------------|
| <p><b>Preferred time to receive calls</b><br/> <input type="checkbox"/> Early Morning (7am-9am) <input type="checkbox"/> Evening (6pm-9pm)<br/> <input type="checkbox"/> Morning (9am-12pm) <input type="checkbox"/> No Preference (9am-9pm)<br/> <input type="checkbox"/> Afternoon (1pm-5pm)</p> <p><b>Do we have your permission to contact you in the future (for other programs)?</b> <input type="checkbox"/> Yes <input type="checkbox"/> No</p> <p>Email _____</p> | <p><b>Preferred phone number</b> _____</p> <p><b>Is this a Cell phone that accepts text messages?</b><br/> <input type="checkbox"/> Yes <input type="checkbox"/> No</p> <p><b>If Yes: Would you prefer text messages instead of phone calls?</b><br/> <input type="checkbox"/> Yes <input type="checkbox"/> No</p> <p><b>Secondary phone number</b> _____</p> |
|----------------------------------------------------------------------------------------------------------------------------------------------------------------------------------------------------------------------------------------------------------------------------------------------------------------------------------------------------------------------------------------------------------------------------------------------------------------------------|---------------------------------------------------------------------------------------------------------------------------------------------------------------------------------------------------------------------------------------------------------------------------------------------------------------------------------------------------------------|

**DO NOT PRINT BELOW THIS LINE (CLINICIAN SECTION)**

|                                                                                                                                                                                                                                                                                                   |                                                                                                                                                                                          |                                                              |                                                                                  |                                                                               |                                                                              |                                                                                                                                                                                                                                                                    |                                                                |
|---------------------------------------------------------------------------------------------------------------------------------------------------------------------------------------------------------------------------------------------------------------------------------------------------|------------------------------------------------------------------------------------------------------------------------------------------------------------------------------------------|--------------------------------------------------------------|----------------------------------------------------------------------------------|-------------------------------------------------------------------------------|------------------------------------------------------------------------------|--------------------------------------------------------------------------------------------------------------------------------------------------------------------------------------------------------------------------------------------------------------------|----------------------------------------------------------------|
| <input type="checkbox"/> In-Patient<br><input type="checkbox"/> Out-patient<br>Clinic/Unit: _____                                                                                                                                                                                                 | MRN: _____<br>PID: _____                                                                                                                                                                 | <b>Counselling duration:</b><br>_____ minutes                | <b>Start of Interview (HH:MM)</b> _____<br><b>End of interview (HH:MM)</b> _____ |                                                                               |                                                                              |                                                                                                                                                                                                                                                                    |                                                                |
| <b>Type of pharmacotherapy</b> <input type="checkbox"/> recommended or <input type="checkbox"/> provided (if a prescription and/or medications are provided at the time of interview)                                                                                                             |                                                                                                                                                                                          |                                                              |                                                                                  |                                                                               |                                                                              |                                                                                                                                                                                                                                                                    |                                                                |
| Type                                                                                                                                                                                                                                                                                              | <input type="checkbox"/> Patch                                                                                                                                                           | <input type="checkbox"/> Gum                                 | <input type="checkbox"/> Lozenge                                                 | <input type="checkbox"/> Inhaler                                              | <input type="checkbox"/> Nasal Spray                                         | <input type="checkbox"/> Zyban / Wellbutrin                                                                                                                                                                                                                        | <input type="checkbox"/> Chantix / Varenicline                 |
| Dose                                                                                                                                                                                                                                                                                              | <input type="checkbox"/> 7mg <input type="checkbox"/> 28mg<br><input type="checkbox"/> 14mg <input type="checkbox"/> 35mg<br><input type="checkbox"/> 21mg <input type="checkbox"/> 42mg | <input type="checkbox"/> 2mg<br><input type="checkbox"/> 4mg | <input type="checkbox"/> 2mg<br><input type="checkbox"/> 4mg                     | <input type="checkbox"/> 2mg<br><input type="checkbox"/> 4mg                  | <input type="checkbox"/> 1-2 sprays<br>(0.5-1mg) in each<br>nostril per hour | <input type="checkbox"/> 150mg<br><input type="checkbox"/> 300mg                                                                                                                                                                                                   | <input type="checkbox"/> 0.5mg<br><input type="checkbox"/> 1mg |
| <b>ASSISTANCE:</b><br><input type="checkbox"/> Stop smoking brochure/handouts provided<br><input type="checkbox"/> Micro Smokelyzer Test _____ ppm, _____%COHb<br><input type="checkbox"/> Pharmacotherapy recommended or provided<br><input type="checkbox"/> NRT voucher given to family member |                                                                                                                                                                                          |                                                              |                                                                                  | <b>OUT-PATIENTS ONLY:</b><br>Return to clinic date:<br>_____ (month/day/year) |                                                                              | <input type="checkbox"/> Follow-up treatment appointment scheduled<br><input type="checkbox"/> Follow-up treatment appointment to be scheduled<br><input type="checkbox"/> No further treatment recommended<br><input type="checkbox"/> Other – No Follow-up calls |                                                                |
